# Supplementary material
Source: publisher figshare collection journal article supplement (https://acs.figshare.com/ndownloader/files/3804901)
Supplement: Supplementary file 1 [file 3804901]

data_global
_audit_creation_date        "2015-01-19"
_audit_creation_method CRYSTALS_ver_14.61

_oxford_structure_analysis_title  'dan154 in P-1'
_chemical_name_systematic         ?
_chemical_melting_point           ?

_publ_contact_author_name         'Mihai Barboiu'
_publ_contact_author_address
;
IEM Mntpellier
;

_publ_requested_journal           ''
_publ_section_title
# Title of paper - generally just the systematic or trivial name
; ?
;

# The loop structure below should contain the names and addresses of all
# authors, in the required order of publication. Repeat as necessary.
loop_
 _publ_author_name
 'Mihai Barboiu' # Author 1
 'Dumitrescu Dan'

_publ_section_exptl_refinement
# Some potentially useful phrases are donated by Bill Clegg:
;
The H atoms were all located in a difference map, but those
attached to carbon atoms were repositioned geometrically.
The H atoms were initially refined with soft restraints on the 
bond lengths and angles to regularise their geometry 
(C---H in the range 0.93--0.98, 
N---H in the range 0.86--0.89 
N---H to 0.86 
O---H = 0.82 
\%A)
and 
U~iso~(H) (in the range 1.2-1.5 times U~eq~ of the parent atom), 
after which the positions were refined with riding constraints 
(Cooper et al, 2010). 

Cooper, R. I., Thompson, A. L. & Watkin, D. J. (2010). J. Appl. Cryst. 
43, 1100-1107. 
 
; 
 
data_1 
 
_exptl_special_details
; 
 The crystal was 
placed in the cold stream of an Oxford 
Cryosystems open-flow nitrogen cryostat (Cosier & 
Glazer, 1986) with a nominal stability of 0.1K. 
 
Cosier, J. & Glazer, A.M., 1986. J. Appl. Cryst. 105-107. 
; 
_refine_special_details 
; 
? 
; 
#--------------------------------------------------------------- 
_cell_length_a                    13.0106(5)
_cell_length_b                    13.1402(6)
_cell_length_c                    14.3888(7)
_cell_angle_alpha                 80.344(4)
_cell_angle_beta                  63.999(4)
_cell_angle_gamma                 78.993(3)
_cell_volume                      2160.43(10)
_cell_measurement_reflns_used   6264
_cell_measurement_theta_min     1.7610
_cell_measurement_theta_max     29.2860
_cell_oxdiff_length_a                  13.0106(5) 
_cell_oxdiff_length_b                  13.1402(5) 
_cell_oxdiff_length_c                  14.3888(7) 
_cell_oxdiff_angle_alpha               80.345(4) 
_cell_oxdiff_angle_beta                63.999(4) 
_cell_oxdiff_angle_gamma               78.993(3) 
_cell_oxdiff_volume                    2160.43(16) 
 
_symmetry_cell_setting            'triclinic' 
_symmetry_space_group_name_H-M    'P -1 ' 
_symmetry_space_group_name_Hall '-P 1'
loop_
 _symmetry_equiv_pos_as_xyz
 'x,y,z'
 '-x,-y,-z'

loop_
_atom_type_symbol
_atom_type_scat_dispersion_real
_atom_type_scat_dispersion_imag
_atom_type_scat_Cromer_Mann_a1
_atom_type_scat_Cromer_Mann_b1
_atom_type_scat_Cromer_Mann_a2
_atom_type_scat_Cromer_Mann_b2
_atom_type_scat_Cromer_Mann_a3
_atom_type_scat_Cromer_Mann_b3
_atom_type_scat_Cromer_Mann_a4
_atom_type_scat_Cromer_Mann_b4
_atom_type_scat_Cromer_Mann_c
_atom_type_scat_source
 C       0.0033   0.0016   2.3100  20.8439   1.0200  10.2075   1.5886   0.5687
   0.8650  51.6512   0.2156 'International Tables Vol C 4.2.6.8 and 6.1.1.4'
 H       0.0000   0.0000   0.4930  10.5109   0.3229  26.1257   0.1402   3.1424
   0.0408  57.7998   0.0030 'International Tables Vol C 4.2.6.8 and 6.1.1.4'
 N       0.0061   0.0033  12.2126   0.0057   3.1322   9.8933   2.0125  28.9975
   1.1663   0.5826 -11.5290 'International Tables Vol C 4.2.6.8 and 6.1.1.4'
 O       0.0106   0.0060   3.0485  13.2771   2.2868   5.7011   1.5463   0.3239
   0.8670  32.9089   0.2508 'International Tables Vol C 4.2.6.8 and 6.1.1.4'
 S       0.1246   0.1234   6.9053   1.4679   5.2034  22.2151   1.4379   0.2536
   1.5863  56.1720   0.8669 'International Tables Vol C 4.2.6.8 and 6.1.1.4'


_cell_formula_units_Z              1

_chemical_formula_sum    'C70 H120 N14 O26 S8'
_chemical_formula_moiety '3(C12 H30 N2), 2(C16 H6 O12 S4), 2(C H7 N4), 2(H2 O)'
_chemical_compound_source                ?
_chemical_formula_weight           1830.36


_cell_measurement_temperature          175

_exptl_crystal_description        'prism'
_exptl_crystal_colour             'yellowish'
_exptl_crystal_size_min           0.25
_exptl_crystal_size_mid           0.30
_exptl_crystal_size_max           0.35
_exptl_absorpt_correction_T_min                   0.96721
_exptl_absorpt_correction_T_max                   1.00000
_exptl_absorpt_correction_type            'multi-scan'
_exptl_absorpt_process_details
;
CrysAlisPro, Agilent Technologies,
Version 1.171.36.24 (release 03-12-2012 CrysAlis171 .NET)
(compiled Dec  3 2012,18:21:49)
Empirical absorption correction using spherical harmonics,
 implemented in SCALE3 ABSPACK scaling algorithm.
;
 
_exptl_crystal_density_diffrn     1.407 
_exptl_crystal_density_meas       ? 
_exptl_crystal_density_method     'not measured' 
# Non-dispersive F(000): 
_exptl_crystal_F_000              974 
_exptl_absorpt_coefficient_mu     0.290
_diffrn_radiation_type 'Mo K\a'
_diffrn_radiation_source 'Enhance (Mo) X-ray Source'
_diffrn_radiation_monochromator 'graphite'
_diffrn_measurement_device_type 'Xcalibur, Sapphire3, Gemini'
_diffrn_detector_area_resol_mean 16.0143
 
_diffrn_measurement_device        'Area' 
_diffrn_radiation_wavelength           0.71073
#montpellier_reflns_maxres is minimum d (highest resolution)
#where <I/sigI> <= 2.0
#(Z. Dauter, Acta Cryst. D55, 1703-1717, 1999)
_montpellier_reflns_maxres 0.73
_montpellier_reflns_completeness_maxres    85.09
_montpellier_reflns_redundancy_maxres     1.91

#montpellier_diffrn_reflns_class_completeness_shell is completeness in shell
#montpellier_diffrn_class_reflns_cumul_completeness is cumulative
#completeness to resolution of shell
#Note: completeness percentage takes into account the fact whether
#group is centrosymmetric or not
loop_
_montpellier_diffrn_reflns_class_number
_montpellier_diffrn_reflns_class_d_res_high
_montpellier_diffrn_reflns_class_d_res_low
_montpellier_diffrn_reflns_class_redundancy
_montpellier_diffrn_reflns_class_av_I/uI
_diffrn_reflns_class_av_R_eq
_montpellier_diffrn_reflns_class_completeness_shell
_montpellier_diffrn_reflns_class_cumul_completeness
  0    100.0     1.65      3.3    49.17    0.022     99.9    99.90
  1     1.65     1.31      2.6    28.71    0.025    100.0    99.95
  2     1.31     1.15      2.4    25.10    0.024     99.9    99.93
  3     1.15     1.04      1.9    16.76    0.033    100.0    99.95
  4     1.04     0.97      1.8    12.78    0.042     99.9    99.94
  5     0.97     0.91      1.7    10.05    0.049    100.0    99.95
  6     0.91     0.87      1.6     8.29    0.053    100.0    99.96
  7     0.87     0.83      1.4     7.30    0.062    100.0    99.96
  8     0.83     0.80      1.4     6.39    0.059     97.7    99.71
  9     0.80     0.73      1.1     4.99    0.082     36.8    85.09
#End reflection statistics
_computing_data_collection
;
CrysAlisPro, Agilent Technologies,
Version 1.171.36.24 (release 03-12-2012 CrysAlis171 .NET)
(compiled Dec  3 2012,18:21:49)
;
_computing_cell_refinement
;
CrysAlisPro, Agilent Technologies,
Version 1.171.36.24 (release 03-12-2012 CrysAlis171 .NET)
(compiled Dec  3 2012,18:21:49)
;
_computing_data_reduction
;
CrysAlisPro, Agilent Technologies,
Version 1.171.36.24 (release 03-12-2012 CrysAlis171 .NET)
(compiled Dec  3 2012,18:21:49)
;
_computing_structure_solution     'Superflip (Palatinus & Chapuis, 2007)' 
_computing_structure_refinement   'CRYSTALS (Betteridge et al., 2003)' 
_computing_publication_material   'CRYSTALS (Betteridge et al., 2003)' 
_computing_molecular_graphics     'CAMERON (Watkin et al., 1996)' 
_diffrn_orient_matrix_UB_11      -0.0398396000
_diffrn_orient_matrix_UB_12       0.0265577000
_diffrn_orient_matrix_UB_13       0.0435861000
_diffrn_orient_matrix_UB_21       0.0251343000
_diffrn_orient_matrix_UB_22      -0.0321022000
_diffrn_orient_matrix_UB_23       0.0314771000
_diffrn_orient_matrix_UB_31       0.0390639000
_diffrn_orient_matrix_UB_32       0.0362741000
_diffrn_orient_matrix_UB_33      -0.0120455000
_diffrn_measurement_details
;
#__ type_ start__ end____ width___ exp.time_
  1 omega  -56.00   39.00   1.0000    9.8000
omega____ theta____ kappa____ phi______ frames
    -       15.6454  -19.0000 -150.0000 95

#__ type_ start__ end____ width___ exp.time_
  2 omega  -10.00   52.00   1.0000    9.8000
omega____ theta____ kappa____ phi______ frames
    -       15.6454   77.0000  150.0000 62

#__ type_ start__ end____ width___ exp.time_
  3 omega    0.00   85.00   1.0000    9.8000
omega____ theta____ kappa____ phi______ frames
    -       15.6454   38.0000   30.0000 85

#__ type_ start__ end____ width___ exp.time_
  4 omega  -24.00   10.00   1.0000    9.8000
omega____ theta____ kappa____ phi______ frames
    -       15.6454  -99.0000 -150.0000 34

#__ type_ start__ end____ width___ exp.time_
  5 omega   22.00   58.00   1.0000    9.8000
omega____ theta____ kappa____ phi______ frames
    -       15.6454   57.0000   90.0000 36

#__ type_ start__ end____ width___ exp.time_
  6 omega  -25.00   22.00   1.0000    9.8000
omega____ theta____ kappa____ phi______ frames
    -      -16.4267  -99.0000   30.0000 47

#__ type_ start__ end____ width___ exp.time_
  7 omega  -59.00  -25.00   1.0000    9.8000
omega____ theta____ kappa____ phi______ frames
    -      -16.4267  110.0000 -168.0000 34

;
_diffrn_measurement_method '\w scans'
 
_diffrn_ambient_temperature        175
_diffrn_reflns_number             19044 
_reflns_number_total              9947 
_diffrn_reflns_av_R_equivalents   0.027 
_diffrn_reflns_av_unetI/netI 0.0432
# Number of reflections without Friedels Law is 0 
# Number of reflections with Friedels Law is 9947 
# Theoretical number of reflections is about 23437 
 
 
_diffrn_reflns_theta_min          1.582 
_diffrn_reflns_theta_max          29.210 
_diffrn_measured_fraction_theta_max 0.851 
 
_diffrn_reflns_theta_full         25.121 
_diffrn_measured_fraction_theta_full 1.000 
 
 
_diffrn_reflns_limit_h_min        -17 
_diffrn_reflns_limit_h_max        14 
_diffrn_reflns_limit_k_min        -17 
_diffrn_reflns_limit_k_max        16 
_diffrn_reflns_limit_l_min        -19 
_diffrn_reflns_limit_l_max        12 
_reflns_limit_h_min               -14 
_reflns_limit_h_max               17 
_reflns_limit_k_min               -17 
_reflns_limit_k_max               17 
_reflns_limit_l_min               0 
_reflns_limit_l_max               19 
 
_oxford_diffrn_Wilson_B_factor    1.33 
_oxford_diffrn_Wilson_scale       0.05 
 
_atom_sites_solution_primary      iterative  #heavy,direct,difmap,geom,iterative
# _atom_sites_solution_secondary  difmap
_atom_sites_solution_hydrogens    difmap
 
_refine_diff_density_min          -0.51 
_refine_diff_density_max          1.44 
 
 
# The current dictionary definitions do not cover the 
# situation where the reflections used for refinement were 
# selected by a user-defined sigma threshold 
 
 
# The values actually used during refinement 
_oxford_reflns_threshold_expression_ref     I>2.0\s(I)
_refine_ls_number_reflns          8229 
_refine_ls_number_restraints      44 
_refine_ls_number_parameters      586 
_oxford_refine_ls_R_factor_ref    0.0483 
_refine_ls_wR_factor_ref          0.0550 
_refine_ls_goodness_of_fit_ref    1.0683 
_refine_ls_shift/su_max           0.0009077 
_refine_ls_shift/su_mean          0.0000497 
 
 
# The values computed with all filters except I/sigma 
_oxford_reflns_number_all         9946 
_refine_ls_R_factor_all           0.0605 
_refine_ls_wR_factor_all          0.0645 
 
# The values computed with a 2 sigma cutoff - a la SHELX 
_reflns_threshold_expression      I>2.0\s(I)
_reflns_number_gt                 8229 
_refine_ls_R_factor_gt            0.0483 
_refine_ls_wR_factor_gt           0.0550 
 
# choose from: rm (reference molecule of known chirality), 
# ad (anomolous dispersion - Flack), rmad (rm and ad), 
# syn (from synthesis), unk (unknown) or . (not applicable). 
_chemical_absolute_configuration  '.' 
 
 
_refine_ls_structure_factor_coef  F 
_refine_ls_matrix_type            full
_refine_ls_hydrogen_treatment     mixed          #undef, noref, refall,
                                                 # refxyz, refU, constr or mixed
_refine_ls_weighting_scheme       calc 
_refine_ls_weighting_details 
;
 Method, part 1, Chebychev polynomial, (Watkin, 1994, Prince, 1982) 
 [weight] = 1.0/[A~0~*T~0~(x)+A~1~*T~1~(x) ... +A~n-1~]*T~n-1~(x)] 
 where A~i~ are the Chebychev coefficients listed below and x= Fcalc/Fmax 
 Method = Robust Weighting (Prince, 1982) 
 W = [weight] * [1-(deltaF/6*sigmaF)^2^]^2^ 
 A~i~ are: 
 10.0 -0.763E-01 7.52 
;
# Insert your own references if required - in alphabetical order 
_publ_section_references 
; 
Betteridge, P.W., Carruthers, J.R., Cooper, R.I., 
Prout, K. & Watkin, D.J. (2003). J. Appl. Cryst. 36, 1487. 
 
Agilent (2011). CrysAlisPro. 
 
Oxford Diffraction, (2006). Gemini User Manual. 
 
Palatinus, L. & Chapuis, G. (2007). J. Appl. Cryst. 40, 786-790. 
 
Prince, E. 
Mathematical Techniques in Crystallography 
and Materials Science 
Springer-Verlag, New York, 1982. 
 
Watkin D.J. (1994). 
Acta Cryst, A50, 411-437. 
 
Watkin, D.J., Prout, C.K. & Pearce, L.J. (1996). CAMERON, Chemical 
Crystallography Laboratory, Oxford, UK. 
; 

# Uequiv = arithmetic mean of Ui i.e. Ueqiv = (U1+U2+U3)/3

# Replace last . with number of unfound hydrogen atoms attached to an atom.

# ..._refinement_flags_... 
# . no refinement constraints           S special position constraint on site
# G rigid group refinement of site      R riding atom
# D distance or angle restraint on site T thermal displacement constraints
# U Uiso or Uij restraint (rigid bond)  P partial occupancy constraint


loop_
_atom_site_label
_atom_site_type_symbol
_atom_site_fract_x
_atom_site_fract_y
_atom_site_fract_z
_atom_site_U_iso_or_equiv
_atom_site_occupancy
_atom_site_adp_type
_atom_site_refinement_flags_posn
_atom_site_refinement_flags_adp
_atom_site_refinement_flags_occupancy
_atom_site_disorder_assembly
_atom_site_disorder_group
_atom_site_attached_hydrogens
S1 S 1.34144(4) -0.04535(4) 0.67813(3) 0.0155 1.0000 Uani . . . . . . 
O2 O 1.33267(14) 0.04861(11) 0.61121(12) 0.0244 1.0000 Uani . . . . . . 
O3 O 1.27371(15) -0.03027(14) 0.78748(11) 0.0296 1.0000 Uani . . . . . . 
O4 O 1.46037(13) -0.08989(12) 0.65428(13) 0.0256 1.0000 Uani . . . . . . 
C5 C 1.27712(15) -0.14026(14) 0.65338(14) 0.0141 1.0000 Uani . . . . . . 
C6 C 1.19284(16) -0.18721(15) 0.73964(14) 0.0150 1.0000 Uani . . . . . . 
C7 C 1.13734(15) -0.26108(14) 0.72826(13) 0.0136 1.0000 Uani . . . . . . 
S8 S 1.02246(4) -0.30768(4) 0.84343(3) 0.0168 1.0000 Uani . . . . . . 
O9 O 0.92094(13) -0.28213(16) 0.82210(12) 0.0342 1.0000 Uani . . . . . . 
O10 O 1.01405(13) -0.25196(13) 0.92609(11) 0.0251 1.0000 Uani . . . . . . 
O11 O 1.05329(15) -0.41898(12) 0.86115(12) 0.0311 1.0000 Uani . . . . . . 
C12 C 1.16489(15) -0.29140(14) 0.62976(14) 0.0135 1.0000 Uani . . . . . . 
C13 C 1.11394(16) -0.37084(14) 0.61417(14) 0.0158 1.0000 Uani . . . . . . 
C14 C 1.13484(16) -0.39183(15) 0.51816(15) 0.0158 1.0000 Uani . . . . . . 
C15 C 1.20918(15) -0.33413(14) 0.42674(14) 0.0134 1.0000 Uani . . . . . . 
C16 C 1.27008(15) -0.26126(14) 0.43845(13) 0.0123 1.0000 Uani . . . . . . 
C17 C 1.24837(15) -0.23977(14) 0.54055(13) 0.0129 1.0000 Uani . . . . . . 
C18 C 1.30616(15) -0.16447(14) 0.55247(14) 0.0130 1.0000 Uani . . . . . . 
C19 C 1.39175(16) -0.11717(14) 0.46096(14) 0.0146 1.0000 Uani . . . . . . 
C20 C 1.41108(16) -0.13628(14) 0.36485(14) 0.0153 1.0000 Uani . . . . . . 
C21 C 1.34867(15) -0.20566(14) 0.34912(14) 0.0138 1.0000 Uani . . . . . . 
C22 C 1.36077(16) -0.22226(15) 0.25025(14) 0.0154 1.0000 Uani . . . . . . 
S23 S 1.44271(4) -0.14739(4) 0.13444(3) 0.0178 1.0000 Uani . . . . . . 
O24 O 1.39565(14) -0.03866(12) 0.15049(12) 0.0263 1.0000 Uani . . . . . . 
O25 O 1.42628(14) -0.18200(13) 0.05161(11) 0.0257 1.0000 Uani . . . . . . 
O26 O 1.56385(13) -0.16853(13) 0.11767(11) 0.0256 1.0000 Uani . . . . . . 
C27 C 1.29854(16) -0.29104(15) 0.23957(14) 0.0167 1.0000 Uani . . . . . . 
C28 C 1.22383(15) -0.34608(15) 0.32593(14) 0.0151 1.0000 Uani . . . . . . 
S29 S 1.13943(4) -0.42434(4) 0.30534(4) 0.0174 1.0000 Uani . . . . . . 
O30 O 1.16841(14) -0.40727(14) 0.19464(12) 0.0293 1.0000 Uani . . . . . . 
O31 O 1.01962(13) -0.38512(13) 0.36789(12) 0.0259 1.0000 Uani . . . . . . 
O32 O 1.17185(17) -0.53048(13) 0.33903(15) 0.0351 1.0000 Uani . . . . . . 
O33 O 1.43646(16) 0.13174(14) 0.20854(14) 0.0320 1.0000 Uani D . . . . . 
N34 N 1.11885(16) 0.25742(15) 0.45187(14) 0.0231 1.0000 Uani D . . . . . 
N35 N 1.15351(17) 0.25638(15) 0.34466(14) 0.0251 1.0000 Uani D . . . . . 
C36 C 1.18915(18) 0.20396(16) 0.49321(16) 0.0203 1.0000 Uani D . . . . . 
N37 N 1.28039(17) 0.14295(16) 0.43704(15) 0.0295 1.0000 Uani D . . . . . 
N38 N 1.16268(18) 0.21169(17) 0.59226(15) 0.0294 1.0000 Uani D . . . . . 
N39 N 0.98255(16) 0.38441(15) -0.09991(13) 0.0228 1.0000 Uani D . . . . . 
C40 C 1.08699(19) 0.33392(19) -0.18317(17) 0.0266 1.0000 Uani D . . . . . 
C41 C 1.1967(2) 0.34087(19) -0.17328(17) 0.0270 1.0000 Uani . . . . . . 
C42 C 1.3036(2) 0.30860(19) -0.27079(17) 0.0276 1.0000 Uani . . . . . . 
C43 C 1.3167(2) 0.38431(18) -0.36683(18) 0.0286 1.0000 Uani . . . . . . 
C44 C 1.4196(2) 0.35024(18) -0.46477(18) 0.0289 1.0000 Uani . . . . . . 
C45 C 1.4267(2) 0.4210(2) -0.56149(19) 0.0328 1.0000 Uani . . . . . . 
C46 C 1.5282(2) 0.38442(19) -0.65983(18) 0.0310 1.0000 Uani . . . . . . 
C47 C 1.5352(2) 0.4524(2) -0.75822(19) 0.0345 1.0000 Uani . . . . . . 
C48 C 1.6326(2) 0.4099(2) -0.8570(2) 0.0378 1.0000 Uani . . . . . . 
C49 C 1.6292(3) 0.4696(2) -0.95651(19) 0.0367 1.0000 Uani . . . . . . 
C50 C 1.6676(2) 0.57731(19) -0.98132(18) 0.0294 1.0000 Uani . . . . . . 
C51 C 1.6457(2) 0.63670(18) -1.07221(18) 0.0281 1.0000 Uani D . . . . . 
N52 N 1.67773(16) 0.74387(15) -1.09351(14) 0.0235 1.0000 Uani D . . . . . 
N53 N 1.67713(18) 0.01544(17) 0.05081(15) 0.0286 1.0000 Uani D . . . . . 
C54 C 1.7868(2) -0.0215(2) -0.0318(2) 0.0402 1.0000 Uani D . . . . . 
C55 C 1.8692(3) 0.0607(2) -0.0769(2) 0.0426 1.0000 Uani . . . . . . 
C56 C 1.9627(3) 0.0340(3) -0.1818(2) 0.0455 1.0000 Uani . . . . . . 
C57 C 1.9256(3) 0.0553(3) -0.2695(2) 0.0474 1.0000 Uani . . . . . . 
C58 C 2.0016(3) 0.0008(2) -0.3654(2) 0.0419 1.0000 Uani . . . . . . 
C59 C 1.9624(3) 0.0267(2) -0.4515(2) 0.0444 1.0000 Uani . . . . . . 
H15 H 1.1729 -0.1692 0.8053 0.0188 1.0000 Uiso R . . . . . 
H16 H 1.4657 -0.1022 0.3076 0.0177 1.0000 Uiso R . . . . . 
H17 H 1.0650 -0.4094 0.6723 0.0186 1.0000 Uiso R . . . . . 
H18 H 1.3061 -0.2995 0.1742 0.0200 1.0000 Uiso R . . . . . 
H20 H 1.4341 -0.0725 0.4688 0.0176 1.0000 Uiso R . . . . . 
H21 H 0.9925(18) 0.4490(14) -0.0985(16) 0.0338 1.0000 Uiso D . . . . . 
H25 H 1.4347 0.4897 -0.5532 0.0390 1.0000 Uiso R . . . . . 
H26 H 1.3694 0.3056 -0.2556 0.0333 1.0000 Uiso R . . . . . 
H33 H 1.4896 0.3479 -0.4557 0.0350 1.0000 Uiso R . . . . . 
H34 H 1.0997 -0.4426 0.5105 0.0188 1.0000 Uiso R . . . . . 
H37 H 1.1024(18) 0.237(2) 0.3300(16) 0.0303 1.0000 Uiso D . . . . . 
H38 H 1.203(2) 0.1721(19) 0.6216(16) 0.0353 1.0000 Uiso D . . . . . 
H42 H 1.4147 0.2800 -0.4742 0.0347 1.0000 Uiso R . . . . . 
H44 H 1.3254 0.4514 -0.3543 0.0341 1.0000 Uiso R . . . . . 
H48 H 1.5643 0.6440 -1.0554 0.0341 1.0000 Uiso R . . . . . 
H49 H 1.163(2) 0.3157(14) 0.3113(15) 0.0306 1.0000 Uiso D . . . . . 
H50 H 1.0909 0.3714 -0.2479 0.0322 1.0000 Uiso R . . . . . 
H52 H 1.6441(18) 0.7738(15) -1.0344(14) 0.0347 1.0000 Uiso D . . . . . 
H53 H 1.1974 0.2950 -0.1138 0.0320 1.0000 Uiso R . . . . . 
H54 H 1.3569 0.4233 -0.5709 0.0392 1.0000 Uiso R . . . . . 
H55 H 1.6432(18) 0.0712(16) 0.0249(16) 0.0428 1.0000 Uiso D . . . . . 
H56 H 1.5198 0.3147 -0.6673 0.0367 1.0000 Uiso R . . . . . 
H57 H 1.7513 0.5699 -1.0003 0.0351 1.0000 Uiso R . . . . . 
H58 H 0.9223(16) 0.3877(17) -0.1144(16) 0.0340 1.0000 Uiso D . . . . . 
H59 H 1.1960 0.4121 -0.1627 0.0320 1.0000 Uiso R . . . . . 
H62 H 1.3265(19) 0.112(2) 0.4632(17) 0.0350 1.0000 Uiso D . . . . . 
H63 H 1.2995 0.2393 -0.2840 0.0333 1.0000 Uiso R . . . . . 
H64 H 1.7541(15) 0.7400(16) -1.1170(17) 0.0348 1.0000 Uiso D . . . . . 
H66 H 1.6262 0.3351 -0.8554 0.0448 1.0000 Uiso R . . . . . 
H67 H 1.0674(19) 0.3058(16) 0.4845(14) 0.0276 1.0000 Uiso D . . . . . 
H68 H 1.2485 0.3892 -0.3786 0.0339 1.0000 Uiso R . . . . . 
H72 H 1.6888 0.6017 -1.1341 0.0337 1.0000 Uiso R . . . . . 
H10 H 1.8250 -0.0789 -0.0035 0.0463 1.0000 Uiso R . . . . . 
H31 H 1.0779 0.2616 -0.1816 0.0317 1.0000 Uiso R . . . . . 
H32 H 0.9696(18) 0.3485(16) -0.0383(14) 0.0337 1.0000 Uiso D . . . . . 
H41 H 1.6533(19) 0.7814(15) -1.1389(16) 0.0346 1.0000 Uiso D . . . . . 
H43 H 1.5994 0.3821 -0.6528 0.0377 1.0000 Uiso R . . . . . 
H45 H 1.4629 0.4575 -0.7631 0.0411 1.0000 Uiso R . . . . . 
H46 H 1.299(2) 0.145(2) 0.3709(14) 0.0349 1.0000 Uiso D . . . . . 
H51 H 1.7079 0.4145 -0.8580 0.0454 1.0000 Uiso R . . . . . 
H60 H 1.6254 0.6167 -0.9210 0.0354 1.0000 Uiso R . . . . . 
H1 H 2.0020 -0.0763 -0.3450 0.0496 1.0000 Uiso R . . . . . 
H61 H 1.5490 0.4773 -0.9479 0.0437 1.0000 Uiso R . . . . . 
H47 H 1.1042(19) 0.253(2) 0.6257(16) 0.0352 1.0000 Uiso D . . . . . 
H65 H 1.5467 0.5220 -0.7523 0.0414 1.0000 Uiso R . . . . . 
H69 H 1.6772 0.4291 -1.0157 0.0440 1.0000 Uiso R . . . . . 
H5 H 1.9027 0.0656 -0.0298 0.0508 1.0000 Uiso R . . . . . 
H11 H 1.7718 -0.0430 -0.0858 0.0480 1.0000 Uiso R . . . . . 
H2 H 1.9890 -0.0414 -0.1755 0.0550 1.0000 Uiso R . . . . . 
H6 H 1.8274 0.1301 -0.0886 0.0520 1.0000 Uiso R . . . . . 
H3 H 1.9621 0.1027 -0.4709 0.0530 1.0000 Uiso R . . . . . 
H4 H 2.0818 0.0194 -0.3928 0.0497 1.0000 Uiso R . . . . . 
H71 H 2.0275 0.0751 -0.1993 0.0551 1.0000 Uiso R . . . . . 
H73 H 1.8839 0.0082 -0.4256 0.0530 1.0000 Uiso R . . . . . 
H13 H 1.422(3) 0.0758(18) 0.205(3) 0.0477 1.0000 Uiso D . . . . . 
H14 H 1.475(3) 0.123(3) 0.242(2) 0.0477 1.0000 Uiso D . . . . . 
H7 H 1.6876(18) 0.0335(18) 0.1032(15) 0.0424 1.0000 Uiso D . . . . . 
H8 H 1.6310(17) -0.0339(15) 0.0746(17) 0.0431 1.0000 Uiso D . . . . . 
H9 H 1.8479 0.0379 -0.2450 0.0568 1.0000 Uiso R . . . . . 
H12 H 1.9240 0.1312 -0.2911 0.0576 1.0000 Uiso R . . . . . 
loop_
_atom_site_aniso_label
_atom_site_aniso_U_11
_atom_site_aniso_U_22
_atom_site_aniso_U_33
_atom_site_aniso_U_23
_atom_site_aniso_U_13
_atom_site_aniso_U_12
S1 0.0179(2) 0.0188(2) 0.0132(2) -0.00127(16) -0.00839(17) -0.00567(17) 
O2 0.0354(8) 0.0184(7) 0.0258(8) -0.0001(6) -0.0189(7) -0.0047(6) 
O3 0.0352(9) 0.0413(9) 0.0151(7) -0.0074(6) -0.0065(6) -0.0179(7) 
O4 0.0206(7) 0.0288(8) 0.0339(8) -0.0010(6) -0.0171(6) -0.0057(6) 
C5 0.0144(8) 0.0157(8) 0.0154(8) -0.0013(7) -0.0087(7) -0.0032(6) 
C6 0.0159(8) 0.0189(9) 0.0111(8) -0.0012(7) -0.0064(7) -0.0029(7) 
C7 0.0128(8) 0.0167(8) 0.0103(8) 0.0013(6) -0.0047(6) -0.0018(6) 
S8 0.0155(2) 0.0242(2) 0.0098(2) 0.00194(17) -0.00394(16) -0.00711(17) 
O9 0.0136(7) 0.0692(13) 0.0181(7) 0.0008(8) -0.0052(6) -0.0096(7) 
O10 0.0290(8) 0.0328(8) 0.0111(6) 0.0000(6) -0.0042(6) -0.0112(6) 
O11 0.0386(9) 0.0230(8) 0.0236(8) 0.0043(6) -0.0053(7) -0.0103(7) 
C12 0.0123(8) 0.0155(8) 0.0126(8) 0.0010(6) -0.0058(6) -0.0026(6) 
C13 0.0155(8) 0.0164(9) 0.0157(8) 0.0014(7) -0.0065(7) -0.0051(7) 
C14 0.0155(8) 0.0160(8) 0.0172(9) 0.0003(7) -0.0077(7) -0.0045(7) 
C15 0.0132(8) 0.0147(8) 0.0124(8) -0.0004(6) -0.0057(6) -0.0021(6) 
C16 0.0124(8) 0.0129(8) 0.0117(8) -0.0011(6) -0.0058(6) -0.0005(6) 
C17 0.0118(8) 0.0146(8) 0.0116(8) -0.0008(6) -0.0045(6) -0.0015(6) 
C18 0.0131(8) 0.0141(8) 0.0124(8) -0.0010(6) -0.0064(6) -0.0011(6) 
C19 0.0145(8) 0.0154(8) 0.0151(8) -0.0002(7) -0.0064(7) -0.0051(7) 
C20 0.0147(8) 0.0168(9) 0.0134(8) 0.0010(7) -0.0046(7) -0.0053(7) 
C21 0.0122(8) 0.0156(8) 0.0127(8) -0.0020(6) -0.0046(6) -0.0011(6) 
C22 0.0150(8) 0.0180(9) 0.0111(8) 0.0009(7) -0.0039(7) -0.0035(7) 
S23 0.0191(2) 0.0234(2) 0.0097(2) 0.00110(17) -0.00437(17) -0.00674(18) 
O24 0.0346(8) 0.0219(7) 0.0207(7) 0.0026(6) -0.0108(6) -0.0062(6) 
O25 0.0307(8) 0.0359(9) 0.0117(6) -0.0005(6) -0.0074(6) -0.0120(7) 
O26 0.0182(7) 0.0377(9) 0.0174(7) 0.0021(6) -0.0042(6) -0.0081(6) 
C27 0.0185(9) 0.0208(9) 0.0118(8) -0.0021(7) -0.0070(7) -0.0028(7) 
C28 0.0132(8) 0.0179(9) 0.0161(8) -0.0042(7) -0.0067(7) -0.0024(7) 
S29 0.0176(2) 0.0205(2) 0.0173(2) -0.00565(17) -0.00848(18) -0.00399(17) 
O30 0.0274(8) 0.0490(10) 0.0176(7) -0.0085(7) -0.0097(6) -0.0137(7) 
O31 0.0176(7) 0.0382(9) 0.0241(7) -0.0096(6) -0.0080(6) -0.0046(6) 
O32 0.0480(10) 0.0190(8) 0.0506(11) -0.0057(7) -0.0310(9) -0.0046(7) 
O33 0.0436(10) 0.0289(9) 0.0319(9) -0.0051(7) -0.0254(8) 0.0025(7) 
N34 0.0239(9) 0.0258(9) 0.0190(8) -0.0053(7) -0.0101(7) 0.0040(7) 
N35 0.0331(10) 0.0257(9) 0.0192(8) -0.0028(7) -0.0148(8) 0.0002(8) 
C36 0.0217(9) 0.0197(9) 0.0202(9) -0.0022(7) -0.0093(8) -0.0030(7) 
N37 0.0296(10) 0.0353(11) 0.0211(9) -0.0047(8) -0.0144(8) 0.0126(8) 
N38 0.0325(10) 0.0336(11) 0.0218(9) -0.0058(8) -0.0139(8) 0.0051(8) 
N39 0.0276(9) 0.0275(9) 0.0168(8) 0.0008(7) -0.0115(7) -0.0089(7) 
C40 0.0296(11) 0.0336(12) 0.0202(10) -0.0072(9) -0.0119(9) -0.0047(9) 
C41 0.0292(11) 0.0334(12) 0.0231(10) -0.0030(9) -0.0159(9) -0.0018(9) 
C42 0.0270(11) 0.0308(12) 0.0257(11) -0.0033(9) -0.0133(9) 0.0006(9) 
C43 0.0285(11) 0.0264(11) 0.0279(11) -0.0019(9) -0.0109(9) 0.0007(9) 
C44 0.0261(11) 0.0260(11) 0.0307(11) 0.0003(9) -0.0109(9) 0.0003(8) 
C45 0.0322(12) 0.0305(12) 0.0293(12) 0.0014(9) -0.0108(10) 0.0011(9) 
C46 0.0297(11) 0.0279(11) 0.0286(12) 0.0039(9) -0.0094(9) -0.0017(9) 
C47 0.0346(13) 0.0338(13) 0.0275(12) 0.0049(10) -0.0102(10) -0.0015(10) 
C48 0.0408(14) 0.0338(13) 0.0289(12) 0.0051(10) -0.0093(11) -0.0030(11) 
C49 0.0479(15) 0.0345(13) 0.0266(12) -0.0014(10) -0.0127(11) -0.0115(11) 
C50 0.0325(12) 0.0303(12) 0.0264(11) 0.0032(9) -0.0133(9) -0.0093(9) 
C51 0.0264(11) 0.0306(11) 0.0284(11) 0.0000(9) -0.0117(9) -0.0085(9) 
N52 0.0187(8) 0.0291(9) 0.0193(8) -0.0007(7) -0.0054(7) -0.0035(7) 
N53 0.0345(10) 0.0342(11) 0.0234(9) 0.0019(8) -0.0160(8) -0.0132(8) 
C54 0.0428(15) 0.0430(15) 0.0292(12) -0.0100(11) -0.0048(11) -0.0132(12) 
C55 0.0452(15) 0.0533(17) 0.0291(13) -0.0065(12) -0.0075(11) -0.0242(13) 
C56 0.0372(14) 0.0559(18) 0.0398(15) -0.0022(13) -0.0122(12) -0.0096(13) 
C57 0.0363(14) 0.067(2) 0.0325(14) -0.0029(13) -0.0060(11) -0.0157(14) 
C58 0.0412(15) 0.0429(15) 0.0383(14) -0.0006(12) -0.0131(12) -0.0096(12) 
C59 0.0446(16) 0.0497(17) 0.0355(14) 0.0011(12) -0.0116(12) -0.0158(13) 

_refine_ls_extinction_method 
    'None'
_oxford_refine_ls_scale 3.253(4) 
loop_
 _geom_bond_atom_site_label_1
 _geom_bond_site_symmetry_1
 _geom_bond_atom_site_label_2
 _geom_bond_site_symmetry_2
 _geom_bond_distance
 _geom_bond_publ_flag
S1 . O2 . 1.4520(15)    yes
S1 . O3 . 1.4539(15)    yes
S1 . O4 . 1.4528(15)    yes
S1 . C5 . 1.7864(18)    yes
C5 . C6 . 1.390(3)    yes
C5 . C18 . 1.407(2)    yes
C6 . C7 . 1.384(3)    yes
C6 . H15 . 0.924    no
C7 . S8 . 1.7868(18)    yes
C7 . C12 . 1.409(2)    yes
S8 . O9 . 1.4503(16)    yes
S8 . O10 . 1.4527(15)    yes
S8 . O11 . 1.4509(17)    yes
C12 . C13 . 1.433(2)    yes
C12 . C17 . 1.433(2)    yes
C13 . C14 . 1.352(3)    yes
C13 . H17 . 0.936    no
C14 . C15 . 1.439(2)    yes
C14 . H34 . 0.924    no
C15 . C16 . 1.426(2)    yes
C15 . C28 . 1.410(2)    yes
C16 . C17 . 1.436(2)    yes
C16 . C21 . 1.432(2)    yes
C17 . C18 . 1.424(2)    yes
C18 . C19 . 1.437(2)    yes
C19 . C20 . 1.351(3)    yes
C19 . H20 . 0.928    no
C20 . C21 . 1.433(2)    yes
C20 . H16 . 0.932    no
C21 . C22 . 1.411(2)    yes
C22 . S23 . 1.7816(18)    yes
C22 . C27 . 1.390(3)    yes
S23 . O24 . 1.4568(16)    yes
S23 . O25 . 1.4546(15)    yes
S23 . O26 . 1.4633(15)    yes
C27 . C28 . 1.386(3)    yes
C27 . H18 . 0.925    no
C28 . S29 . 1.7804(18)    yes
S29 . O30 . 1.4544(15)    yes
S29 . O31 . 1.4575(15)    yes
S29 . O32 . 1.4443(17)    yes
O33 . H13 . 0.809(18)    no
O33 . H14 . 0.814(17)    no
N34 . N35 . 1.406(2)    yes
N34 . C36 . 1.332(3)    yes
N34 . H67 . 0.857(17)    no
N35 . H37 . 0.872(17)    no
N35 . H49 . 0.844(17)    no
C36 . N37 . 1.311(3)    yes
C36 . N38 . 1.329(3)    yes
N37 . H62 . 0.848(17)    no
N37 . H46 . 0.870(17)    no
N38 . H38 . 0.863(17)    no
N38 . H47 . 0.842(17)    no
N39 . C40 . 1.489(3)    yes
N39 . H21 . 0.888(17)    no
N39 . H58 . 0.887(17)    no
N39 . H32 . 0.893(17)    no
C40 . C41 . 1.516(3)    yes
C40 . H50 . 0.962    no
C40 . H31 . 0.976    no
C41 . C42 . 1.532(3)    yes
C41 . H53 . 0.964    no
C41 . H59 . 0.971    no
C42 . C43 . 1.525(3)    yes
C42 . H26 . 0.964    no
C42 . H63 . 0.977    no
C43 . C44 . 1.519(3)    yes
C43 . H44 . 0.966    no
C43 . H68 . 0.962    no
C44 . C45 . 1.515(3)    yes
C44 . H33 . 0.970    no
C44 . H42 . 0.972    no
C45 . C46 . 1.525(3)    yes
C45 . H25 . 0.961    no
C45 . H54 . 0.970    no
C46 . C47 . 1.518(3)    yes
C46 . H56 . 0.971    no
C46 . H43 . 0.970    no
C47 . C48 . 1.535(4)    yes
C47 . H45 . 0.963    no
C47 . H65 . 0.978    no
C48 . C49 . 1.528(3)    yes
C48 . H66 . 0.998    no
C48 . H51 . 0.986    no
C49 . C50 . 1.524(3)    yes
C49 . H61 . 0.982    no
C49 . H69 . 0.978    no
C50 . C51 . 1.517(3)    yes
C50 . H57 . 0.989    no
C50 . H60 . 0.973    no
C51 . N52 . 1.490(3)    yes
C51 . H48 . 0.966    no
C51 . H72 . 0.960    no
N52 . H52 . 0.888(17)    no
N52 . H64 . 0.892(17)    no
N52 . H41 . 0.886(17)    no
N53 . C54 . 1.458(3)    yes
N53 . H55 . 0.895(17)    no
N53 . H7 . 0.898(17)    no
N53 . H8 . 0.890(17)    no
C54 . C55 . 1.528(4)    yes
C54 . H10 . 0.955    no
C54 . H11 . 0.974    no
C55 . C56 . 1.512(4)    yes
C55 . H5 . 0.969    no
C55 . H6 . 0.997    no
C56 . C57 . 1.506(4)    yes
C56 . H2 . 0.988    no
C56 . H71 . 1.004    no
C57 . C58 . 1.503(4)    yes
C57 . H9 . 0.973    no
C57 . H12 . 0.992    no
C58 . C59 . 1.503(4)    yes
C58 . H1 . 1.007    no
C58 . H4 . 1.005    no
C59 . C59 2_954 1.506(6)    yes
C59 . H3 . 0.990    no
C59 . H73 . 0.986    no
loop_
 _geom_angle_atom_site_label_1
 _geom_angle_site_symmetry_1
 _geom_angle_atom_site_label_2
 _geom_angle_site_symmetry_2
 _geom_angle_atom_site_label_3
 _geom_angle_site_symmetry_3
 _geom_angle
 _geom_angle_publ_flag
O2 . S1 . O3 . 112.11(10)    yes
O2 . S1 . O4 . 112.40(9)    yes
O3 . S1 . O4 . 113.09(10)    yes
O2 . S1 . C5 . 107.34(9)    yes
O3 . S1 . C5 . 105.01(9)    yes
O4 . S1 . C5 . 106.26(9)    yes
S1 . C5 . C6 . 116.24(14)    yes
S1 . C5 . C18 . 122.61(14)    yes
C6 . C5 . C18 . 121.12(16)    yes
C5 . C6 . C7 . 120.50(17)    yes
C5 . C6 . H15 . 120.3    no
C7 . C6 . H15 . 119.2    no
C6 . C7 . S8 . 116.25(13)    yes
C6 . C7 . C12 . 121.30(16)    yes
S8 . C7 . C12 . 122.29(14)    yes
C7 . S8 . O9 . 105.33(9)    yes
C7 . S8 . O10 . 105.94(9)    yes
O9 . S8 . O10 . 112.64(10)    yes
C7 . S8 . O11 . 107.52(9)    yes
O9 . S8 . O11 . 112.84(11)    yes
O10 . S8 . O11 . 111.96(10)    yes
C7 . C12 . C13 . 123.52(16)    yes
C7 . C12 . C17 . 118.06(16)    yes
C13 . C12 . C17 . 118.42(16)    yes
C12 . C13 . C14 . 121.95(17)    yes
C12 . C13 . H17 . 118.8    no
C14 . C13 . H17 . 119.2    no
C13 . C14 . C15 . 121.01(17)    yes
C13 . C14 . H34 . 120.1    no
C15 . C14 . H34 . 118.9    no
C14 . C15 . C16 . 118.74(16)    yes
C14 . C15 . C28 . 122.75(16)    yes
C16 . C15 . C28 . 118.51(16)    yes
C15 . C16 . C17 . 119.82(16)    yes
C15 . C16 . C21 . 120.43(16)    yes
C17 . C16 . C21 . 119.69(16)    yes
C16 . C17 . C12 . 119.51(16)    yes
C16 . C17 . C18 . 119.95(16)    yes
C12 . C17 . C18 . 120.48(16)    yes
C17 . C18 . C5 . 118.44(16)    yes
C17 . C18 . C19 . 118.46(16)    yes
C5 . C18 . C19 . 123.10(16)    yes
C18 . C19 . C20 . 121.43(16)    yes
C18 . C19 . H20 . 118.6    no
C20 . C19 . H20 . 119.9    no
C19 . C20 . C21 . 121.82(16)    yes
C19 . C20 . H16 . 118.5    no
C21 . C20 . H16 . 119.6    no
C20 . C21 . C16 . 118.26(16)    yes
C20 . C21 . C22 . 123.49(16)    yes
C16 . C21 . C22 . 118.24(16)    yes
C21 . C22 . S23 . 122.62(14)    yes
C21 . C22 . C27 . 121.02(16)    yes
S23 . C22 . C27 . 116.00(14)    yes
C22 . S23 . O24 . 106.52(9)    yes
C22 . S23 . O25 . 105.85(9)    yes
O24 . S23 . O25 . 112.30(10)    yes
C22 . S23 . O26 . 108.39(9)    yes
O24 . S23 . O26 . 112.03(10)    yes
O25 . S23 . O26 . 111.37(9)    yes
C22 . C27 . C28 . 120.73(17)    yes
C22 . C27 . H18 . 119.8    no
C28 . C27 . H18 . 119.5    no
C15 . C28 . C27 . 121.01(17)    yes
C15 . C28 . S29 . 121.43(14)    yes
C27 . C28 . S29 . 117.40(14)    yes
C28 . S29 . O30 . 105.40(9)    yes
C28 . S29 . O31 . 105.68(9)    yes
O30 . S29 . O31 . 112.23(10)    yes
C28 . S29 . O32 . 106.60(9)    yes
O30 . S29 . O32 . 113.33(11)    yes
O31 . S29 . O32 . 112.83(11)    yes
H13 . O33 . H14 . 109(3)    no
N35 . N34 . C36 . 117.98(17)    yes
N35 . N34 . H67 . 119.7(12)    no
C36 . N34 . H67 . 119.2(12)    no
N34 . N35 . H37 . 113.3(14)    no
N34 . N35 . H49 . 113.4(14)    no
H37 . N35 . H49 . 103(2)    no
N34 . C36 . N37 . 119.86(19)    yes
N34 . C36 . N38 . 118.67(19)    yes
N37 . C36 . N38 . 121.44(19)    yes
C36 . N37 . H62 . 118.9(14)    no
C36 . N37 . H46 . 118.7(14)    no
H62 . N37 . H46 . 121(2)    no
C36 . N38 . H38 . 119.2(14)    no
C36 . N38 . H47 . 118.9(14)    no
H38 . N38 . H47 . 122(2)    no
C40 . N39 . H21 . 109.3(13)    no
C40 . N39 . H58 . 109.1(13)    no
H21 . N39 . H58 . 108.0(15)    no
C40 . N39 . H32 . 110.6(13)    no
H21 . N39 . H32 . 109.9(15)    no
H58 . N39 . H32 . 110.0(15)    no
N39 . C40 . C41 . 112.19(17)    yes
N39 . C40 . H50 . 106.3    no
C41 . C40 . H50 . 108.4    no
N39 . C40 . H31 . 109.1    no
C41 . C40 . H31 . 111.0    no
H50 . C40 . H31 . 109.7    no
C40 . C41 . C42 . 111.04(18)    yes
C40 . C41 . H53 . 108.0    no
C42 . C41 . H53 . 109.6    no
C40 . C41 . H59 . 108.5    no
C42 . C41 . H59 . 109.9    no
H53 . C41 . H59 . 109.7    no
C41 . C42 . C43 . 113.20(19)    yes
C41 . C42 . H26 . 106.6    no
C43 . C42 . H26 . 109.5    no
C41 . C42 . H63 . 108.9    no
C43 . C42 . H63 . 109.4    no
H26 . C42 . H63 . 109.1    no
C42 . C43 . C44 . 113.44(19)    yes
C42 . C43 . H44 . 108.5    no
C44 . C43 . H44 . 108.6    no
C42 . C43 . H68 . 108.4    no
C44 . C43 . H68 . 107.5    no
H44 . C43 . H68 . 110.4    no
C43 . C44 . C45 . 113.26(19)    yes
C43 . C44 . H33 . 108.8    no
C45 . C44 . H33 . 109.4    no
C43 . C44 . H42 . 108.8    no
C45 . C44 . H42 . 108.8    no
H33 . C44 . H42 . 107.6    no
C44 . C45 . C46 . 112.9(2)    yes
C44 . C45 . H25 . 108.7    no
C46 . C45 . H25 . 108.6    no
C44 . C45 . H54 . 109.6    no
C46 . C45 . H54 . 107.4    no
H25 . C45 . H54 . 109.7    no
C45 . C46 . C47 . 113.9(2)    yes
C45 . C46 . H56 . 108.1    no
C47 . C46 . H56 . 107.6    no
C45 . C46 . H43 . 109.2    no
C47 . C46 . H43 . 108.9    no
H56 . C46 . H43 . 109.1    no
C46 . C47 . C48 . 113.1(2)    yes
C46 . C47 . H45 . 108.7    no
C48 . C47 . H45 . 108.8    no
C46 . C47 . H65 . 108.0    no
C48 . C47 . H65 . 109.8    no
H45 . C47 . H65 . 108.4    no
C47 . C48 . C49 . 113.0(2)    yes
C47 . C48 . H66 . 108.2    no
C49 . C48 . H66 . 109.7    no
C47 . C48 . H51 . 109.6    no
C49 . C48 . H51 . 107.8    no
H66 . C48 . H51 . 108.5    no
C48 . C49 . C50 . 114.6(2)    yes
C48 . C49 . H61 . 106.9    no
C50 . C49 . H61 . 108.7    no
C48 . C49 . H69 . 110.0    no
C50 . C49 . H69 . 108.5    no
H61 . C49 . H69 . 107.9    no
C49 . C50 . C51 . 111.0(2)    yes
C49 . C50 . H57 . 109.4    no
C51 . C50 . H57 . 108.1    no
C49 . C50 . H60 . 109.7    no
C51 . C50 . H60 . 108.9    no
H57 . C50 . H60 . 109.8    no
C50 . C51 . N52 . 111.18(18)    yes
C50 . C51 . H48 . 109.3    no
N52 . C51 . H48 . 107.0    no
C50 . C51 . H72 . 111.3    no
N52 . C51 . H72 . 108.4    no
H48 . C51 . H72 . 109.6    no
C51 . N52 . H52 . 108.5(13)    no
C51 . N52 . H64 . 109.2(13)    no
H52 . N52 . H64 . 109.0(15)    no
C51 . N52 . H41 . 110.4(13)    no
H52 . N52 . H41 . 108.8(15)    no
H64 . N52 . H41 . 111.0(15)    no
C54 . N53 . H55 . 108.8(13)    no
C54 . N53 . H7 . 111.2(13)    no
H55 . N53 . H7 . 108.8(15)    no
C54 . N53 . H8 . 109.9(13)    no
H55 . N53 . H8 . 108.5(15)    no
H7 . N53 . H8 . 109.6(15)    no
N53 . C54 . C55 . 112.3(2)    yes
N53 . C54 . H10 . 109.0    no
C55 . C54 . H10 . 105.6    no
N53 . C54 . H11 . 108.8    no
C55 . C54 . H11 . 110.8    no
H10 . C54 . H11 . 110.4    no
C54 . C55 . C56 . 110.1(2)    yes
C54 . C55 . H5 . 110.1    no
C56 . C55 . H5 . 110.5    no
C54 . C55 . H6 . 110.4    no
C56 . C55 . H6 . 106.6    no
H5 . C55 . H6 . 109.1    no
C55 . C56 . C57 . 115.1(3)    yes
C55 . C56 . H2 . 107.2    no
C57 . C56 . H2 . 107.4    no
C55 . C56 . H71 . 108.0    no
C57 . C56 . H71 . 108.6    no
H2 . C56 . H71 . 110.5    no
C56 . C57 . C58 . 116.6(3)    yes
C56 . C57 . H9 . 109.7    no
C58 . C57 . H9 . 108.0    no
C56 . C57 . H12 . 107.2    no
C58 . C57 . H12 . 106.7    no
H9 . C57 . H12 . 108.3    no
C57 . C58 . C59 . 114.5(3)    yes
C57 . C58 . H1 . 107.6    no
C59 . C58 . H1 . 107.4    no
C57 . C58 . H4 . 109.1    no
C59 . C58 . H4 . 108.1    no
H1 . C58 . H4 . 110.0    no
C59 2_954 C59 . C58 . 115.4(3)    yes
C59 2_954 C59 . H3 . 107.4    no
C58 . C59 . H3 . 106.8    no
C59 2_954 C59 . H73 . 108.0    no
C58 . C59 . H73 . 108.8    no
H3 . C59 . H73 . 110.4    no
loop_
 _geom_hbond_atom_site_label_D
 _geom_hbond_site_symmetry_D
 _geom_hbond_atom_site_label_H
 _geom_hbond_site_symmetry_H
 _geom_hbond_atom_site_label_A
 _geom_hbond_site_symmetry_A
 _geom_hbond_angle_DHA
 _geom_hbond_distance_DH
 _geom_hbond_distance_HA
 _geom_hbond_distance_DA
 _geom_hbond_publ_flag
N39 . H21 . O11 1_564 161.5(19) 0.888 1.938 2.794(3)    yes
N35 . H37 . O9 2_756 126.3(18) 0.872 2.305 2.907(3)    yes
N38 . H38 . O2 . 147.8(19) 0.863 2.075 2.843(3)    yes
N35 . H49 . O32 1_565 138.0(19) 0.844 2.157 2.841(3)    yes
N52 . H52 . O25 1_564 120.1(17) 0.888 2.537 3.080(3)    yes
N52 . H52 . O26 1_564 174.2(19) 0.888 2.169 3.054(3)    yes
N53 . H55 . O25 2_855 171(2) 0.895 1.995 2.882(3)    yes
N39 . H58 . O30 2_755 159.7(19) 0.887 1.942 2.791(3)    yes
C41 . H59 . O11 1_564 136.03(6) 0.971 2.572 3.339(3)    yes
N37 . H62 . O2 . 142(2) 0.848 2.183 2.900(3)    yes
N52 . H64 . O9 1_663 172.7(20) 0.892 1.934 2.822(3)    yes
N34 . H67 . O31 2_756 146.0(15) 0.857 2.250 2.999(3)    yes
N39 . H32 . O10 2_756 163.6(19) 0.893 1.942 2.810(3)    yes
N52 . H41 . O33 2_864 166(2) 0.886 1.950 2.818(3)    yes
N37 . H46 . O33 . 149(2) 0.870 2.244 3.025(3)    yes
N38 . H47 . O31 2_756 151(2) 0.842 2.118 2.886(3)    yes
C49 . H69 . O30 2_854 152.98(7) 0.978 2.498 3.399(3)    yes
O33 . H13 . O24 . 161(3) 0.809 1.952 2.732(3)    yes
O33 . H14 . O4 2_856 168(3) 0.814 1.969 2.771(3)    yes
N53 . H7 . O3 2_856 163(2) 0.898 1.842 2.714(3)    yes
N53 . H8 . O26 . 166(2) 0.890 2.006 2.877(3)    yes


_iucr_refine_instructions_details
;
#
# Punched on 19/01/15 at 11:14:10
#
#LIST     12                                                                    
BLOCK 
CONT SCALE 
CONT S    (    1 ,X'S,U'S)  UNTIL C    (   59 ) 
CONT H    (   21 ,X'S) 
CONT H    (   37 ,X'S)  UNTIL H    (   38 ) 
CONT H    (   49 ,X'S) 
CONT H    (   52 ,X'S) 
CONT H    (   55 ,X'S) 
CONT H    (   58 ,X'S) 
CONT H    (   62 ,X'S) 
CONT H    (   64 ,X'S) 
CONT H    (   67 ,X'S) 
CONT H    (   32 ,X'S)  UNTIL H    (   41 ) 
CONT H    (   46 ,X'S) 
CONT H    (   47 ,X'S) 
CONT H    (   13 ,X'S)  UNTIL H    (    8 ) 
RIDE C   (   6,X'S) H   (  15,X'S) 
RIDE C   (  13,X'S) H   (  17,X'S) 
RIDE C   (  14,X'S) H   (  34,X'S) 
RIDE C   (  19,X'S) H   (  20,X'S) 
RIDE C   (  20,X'S) H   (  16,X'S) 
RIDE C   (  27,X'S) H   (  18,X'S) 
RIDE C   (  40,X'S) H   (  50,X'S) H   (  31,X'S) 
RIDE C   (  41,X'S) H   (  53,X'S) H   (  59,X'S) 
RIDE C   (  42,X'S) H   (  26,X'S) H   (  63,X'S) 
RIDE C   (  43,X'S) H   (  44,X'S) H   (  68,X'S) 
RIDE C   (  44,X'S) H   (  33,X'S) H   (  42,X'S) 
RIDE C   (  45,X'S) H   (  25,X'S) H   (  54,X'S) 
RIDE C   (  46,X'S) H   (  56,X'S) H   (  43,X'S) 
RIDE C   (  47,X'S) H   (  45,X'S) H   (  65,X'S) 
RIDE C   (  48,X'S) H   (  66,X'S) H   (  51,X'S) 
RIDE C   (  49,X'S) H   (  61,X'S) H   (  69,X'S) 
RIDE C   (  50,X'S) H   (  57,X'S) H   (  60,X'S) 
RIDE C   (  51,X'S) H   (  48,X'S) H   (  72,X'S) 
RIDE C   (  54,X'S) H   (  10,X'S) H   (  11,X'S) 
RIDE C   (  55,X'S) H   (   5,X'S) H   (   6,X'S) 
RIDE C   (  56,X'S) H   (   2,X'S) H   (  71,X'S) 
RIDE C   (  57,X'S) H   (   9,X'S) H   (  12,X'S) 
RIDE C   (  58,X'S) H   (   1,X'S) H   (   4,X'S) 
RIDE C   (  59,X'S) H   (   3,X'S) H   (  73,X'S) 
END                                                                             
#
# Punched on 19/01/15 at 11:14:10
#
#LIST     16                                                                    
NO 
REM   HREST   START (DO NOT REMOVE THIS LINE) 
REM NO H   NO #H U MULT DIST 
REM C-H 
REM >4           1.5    .96 DISORDER 
REM 1      1     1.2    .93 C C-H (ACETYLENE) 
REM 1      2     1.2    .93 C-C(H)-C 
REM 1      3     1.2    .98 (C)3-C-H 
REM 2      1     1.2    .93 C=C-H(2) 
REM 2      2     1.2    .97 (C)2-C-(H)2 
REM 3      1     1.5    .96 C-C-(H)3 
REM N-H 
REM >4           1.5    .89 DISORDER 
REM 1      1     1.2    .86 N-N/H 
REM 1      2     1.2    .86 (C)2-N-H 
REM 1      3     1.2    .89 (C)3-N-H 
REM 2      1     1.2    .86 C-N-(H)2 
REM 2      2     1.2    .89 (C)2-N-(H)2 
REM 3      1     1.2    .89 C-H-(H)3 
REM O-H 
REM 1      1     1.5    .82 O-H 
REM 
REM DIST      ESD = 0.02 
REM VIB       ESD = 0.002 
REM ANGLE     ESD = 2.0 
REM       H ON O-HETRO ATOM 
DIST 0.82, 0.02 = 
CONT O ( 33) TO H(13) 
CONT O ( 33) TO H(14) 
REST 0.048, 0.002 = H(13,U[ISO]) 
REST 0.048, 0.002 = H(14,U[ISO]) 
REM            H1-N-R2 
DIST 0.86, 0.02 = 
CONT N ( 34) TO H(67) 
REST 0.028, 0.002 = H(67,U[ISO]) 
ANGLE 0.0, 2.0 = MEAN 
CONT H(67) TO N ( 34) TO N(35) 
CONT H(67) TO N ( 34) TO C(36) 
REM            H2-N-R 
DIST 0.86, 0.02 = 
CONT N ( 35) TO H(37) 
CONT N ( 35) TO H(49) 
REST 0.030, 0.002 = H(37,U[ISO]) 
REST 0.030, 0.002 = H(49,U[ISO]) 
ANGLE 120.0, 2.0 = 
CONT N(34) TO N ( 35) TO H(37) 
CONT N(34) TO N ( 35) TO H(49) 
REM            H2-N-R 
DIST 0.86, 0.02 = 
CONT N ( 37) TO H(62) 
CONT N ( 37) TO H(46) 
REST 0.035, 0.002 = H(62,U[ISO]) 
REST 0.035, 0.002 = H(46,U[ISO]) 
ANGLE 120.0, 2.0 = 
CONT C(36) TO N ( 37) TO H(62) 
CONT C(36) TO N ( 37) TO H(46) 
REM            H2-N-R 
DIST 0.86, 0.02 = 
CONT N ( 38) TO H(38) 
CONT N ( 38) TO H(47) 
REST 0.035, 0.002 = H(38,U[ISO]) 
REST 0.035, 0.002 = H(47,U[ISO]) 
ANGLE 120.0, 2.0 = 
CONT C(36) TO N ( 38) TO H(38) 
CONT C(36) TO N ( 38) TO H(47) 
REM POSSIBLY DISORDERED, NO OF H ATOMS=     3 
DIST 0.89, 0.02 = 
CONT N ( 39) TO H(21) 
CONT N ( 39) TO H(58) 
CONT N ( 39) TO H(32) 
REST 0.034, 0.002 = H(21,U[ISO]) 
REST 0.034, 0.002 = H(58,U[ISO]) 
REST 0.034, 0.002 = H(32,U[ISO]) 
ANGLE 109.54, 2.0 = 
CONT C(40) TO N ( 39) TO H(21) 
CONT C(40) TO N ( 39) TO H(58) 
CONT C(40) TO N ( 39) TO H(32) 
ANGLE 0.0, 2.0 = MEAN H(21) TO N ( 39) TO H(58) 
CONT H(21) TO N ( 39) TO H(32) 
CONT H(58) TO N ( 39) TO H(32) 
REM POSSIBLY DISORDERED, NO OF H ATOMS=     3 
DIST 0.89, 0.02 = 
CONT N ( 52) TO H(52) 
CONT N ( 52) TO H(64) 
CONT N ( 52) TO H(41) 
REST 0.035, 0.002 = H(52,U[ISO]) 
REST 0.035, 0.002 = H(64,U[ISO]) 
REST 0.035, 0.002 = H(41,U[ISO]) 
ANGLE 109.54, 2.0 = 
CONT C(51) TO N ( 52) TO H(52) 
CONT C(51) TO N ( 52) TO H(64) 
CONT C(51) TO N ( 52) TO H(41) 
ANGLE 0.0, 2.0 = MEAN H(52) TO N ( 52) TO H(64) 
CONT H(52) TO N ( 52) TO H(41) 
CONT H(64) TO N ( 52) TO H(41) 
REM POSSIBLY DISORDERED, NO OF H ATOMS=     3 
DIST 0.89, 0.02 = 
CONT N ( 53) TO H(55) 
CONT N ( 53) TO H(7) 
CONT N ( 53) TO H(8) 
REST 0.043, 0.002 = H(55,U[ISO]) 
REST 0.043, 0.002 = H(7,U[ISO]) 
REST 0.043, 0.002 = H(8,U[ISO]) 
ANGLE 109.54, 2.0 = 
CONT C(54) TO N ( 53) TO H(55) 
CONT C(54) TO N ( 53) TO H(7) 
CONT C(54) TO N ( 53) TO H(8) 
ANGLE 0.0, 2.0 = MEAN H(55) TO N ( 53) TO H(7) 
CONT H(55) TO N ( 53) TO H(8) 
CONT H(7) TO N ( 53) TO H(8) 
REM   HREST   END (DO NOT REMOVE THIS LINE) 
END                                                                             
;

# Manually omitted reflections

loop_
_oxford_refln_omitted_index_h
_oxford_refln_omitted_index_k
_oxford_refln_omitted_index_l
_oxford_refln_omitted_flag
_oxford_refln_omitted_details
   2  -2   1  x   .
